# Supplementary material for: Healthcare Resource Utilization and Costs of Rivaroxaban Versus Warfarin Among Non-valvular Atrial Fibrillation (NVAF) Patients with Diabetes in a US Population
Source: PubMed Central journal article supplement — Adv Ther. 2023 Jan 19;40(3):1224–41. doi: 10.1007/s12325-022-02422-9 (PMC9988717; doi:10.1007/s12325-022-02422-9), 2023-01-19
Supplement: 12325_2022_2422_MOESM1_ESM.pdf [file 12325_2022_2422_MOESM1_ESM.pdf]

**Healthcare Resource Utilization and Costs of Rivaroxaban Versus Warfarin Among Non-valvular Atrial Fibrillation (NVAF) Patients with Diabetes in a US Population –  
Supplementary Material**

Jeffrey S. Berger<sup>1</sup>; Veronica Ashton<sup>2</sup>; François Laliberté<sup>3</sup>; Guillaume Germain<sup>3</sup>; Brahim Bookhart<sup>2</sup>;  
Dominique Lejeune<sup>3</sup>; Julien Boudreau<sup>3</sup>; Patrick Lefebvre<sup>3</sup>; Matthew R. Weir<sup>4</sup>

<sup>1</sup> New York University School of Medicine, New York, NY, USA;

<sup>2</sup> Janssen Scientific Affairs, LLC, Titusville, NJ, USA;

<sup>3</sup> Groupe d'analyse, Ltée, Montréal, Québec, Canada;

<sup>4</sup> University of Maryland School of Medicine, Baltimore, MD, USA

**Corresponding author:** Guillaume Germain, Groupe d'analyse, Ltée

1190 avenue des Canadiens-de-Montréal, Tour Deloitte, Suite 1500, Montréal, Québec, H3B 0G7 Canada

Phone: 514-394-4446; E-mail: [guillaume.germain@analysisgroup.com](mailto:guillaume.germain@analysisgroup.com)

**Number of Figures/Tables:** 2 supplementary figures

*S1 Figure. Healthcare Resource Utilization Among Weighted Rivaroxaban and Warfarin Cohorts – Up to 24 Months of Follow-Up<sup>1</sup>*

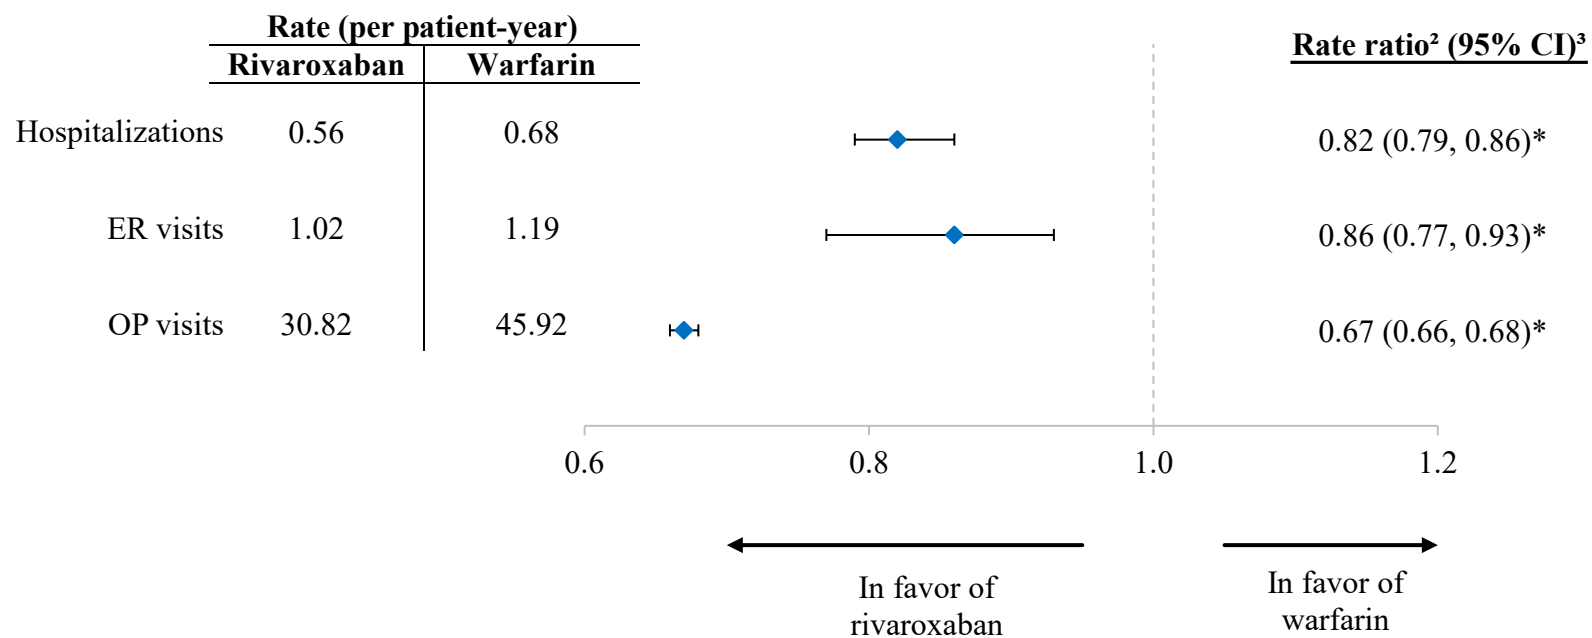

\*p<0.001

CI confidence intervals; ER emergency room; OP outpatient

**Notes:**

<sup>1</sup>The observation period spans from the index date up to the treatment discontinuation, a switch to/addition of another oral anticoagulant, 24 months (sensitivity analysis) post-index, death, end of eligibility, or end of data availability, whichever occurs first

<sup>2</sup>Rate ratios are calculated from Poisson regression models

<sup>3</sup>CIs and p-values are generated using a non-parametric bootstrap procedure with 499 replications

**S2 Figure. Healthcare Costs Among Weighted Rivaroxaban and Warfarin Cohorts — Up to 24 Months of Follow-Up<sup>1</sup>**

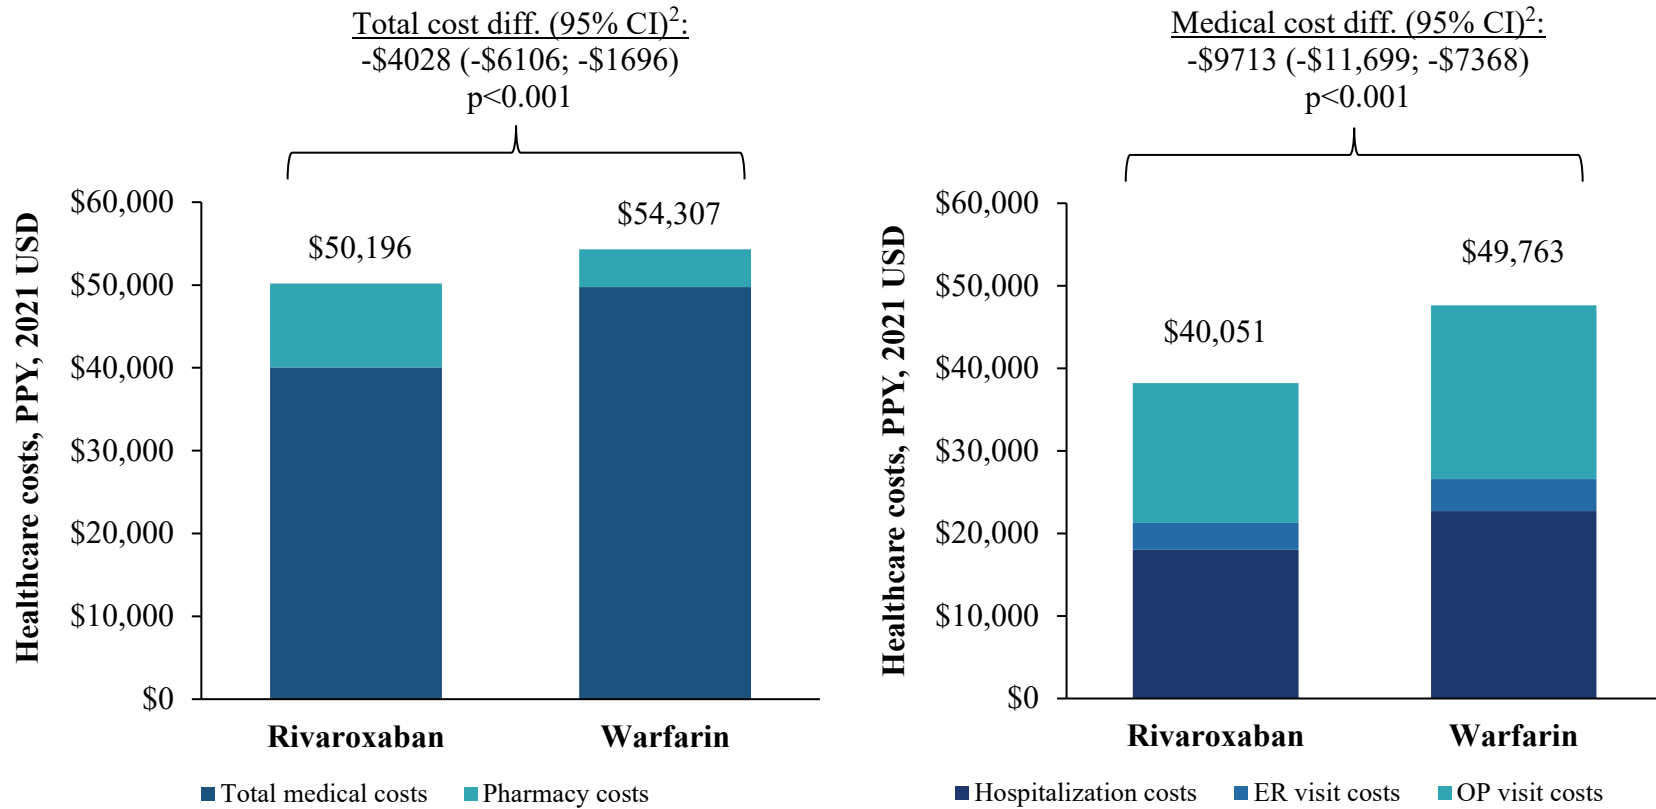

CI confidence intervals; ER emergency room; OP outpatient; PPY per patient-year

**Notes:**

<sup>1</sup>The observation period spans from the index date up to the treatment discontinuation, a switch to/addition of another oral anticoagulant, 24 months (sensitivity analysis) post-index, death, end of eligibility, or end of data availability, whichever occurs first

<sup>2</sup>CI and p-values are generated using a non-parametric bootstrap procedure with 499 replications
